# Supplementary material for: New Li2FeSiO4–carbon monoliths with controlled macropores: effects of pore properties on electrode performance
Source: Royal Society of Chemistry journal article supplement (doi:10.1039/c3cp50352f), 2013-01-01
Supplement: c3cp50352f.pdf [file c3cp50352f.pdf]

## Supporting Information

### Porous $\text{Li}_2\text{FeSiO}_4$ /Carbon Monoliths with Controlled Macropores: Effects of Pore Properties on Electrode Performance as Cathode of Lithium Ion Batteries

By George Hasegawa,\* Mai Sannohe, Yuya Ishihara, Kazuyoshi Kanamori, Kazuki Nakanishi, and Takeshi Abe

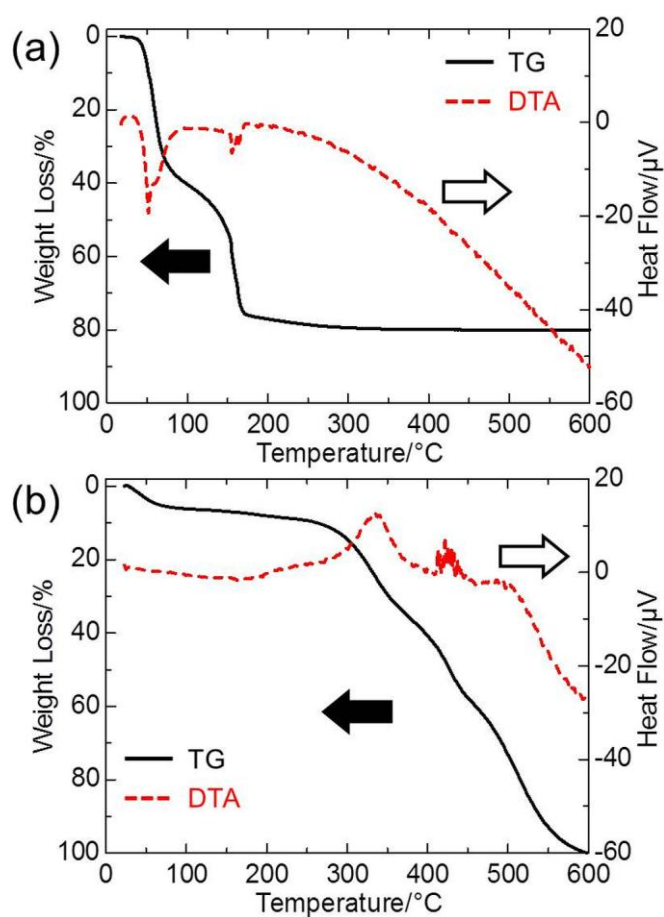

Figure S1 TG-DTA curves of (a)  $\text{Fe}(\text{NO}_3)_3 \cdot 9\text{H}_2\text{O}$  and (b) Poly(vinylpyrrolidone) (PVP,  $M_w = 55,000$ ) under air atmosphere.

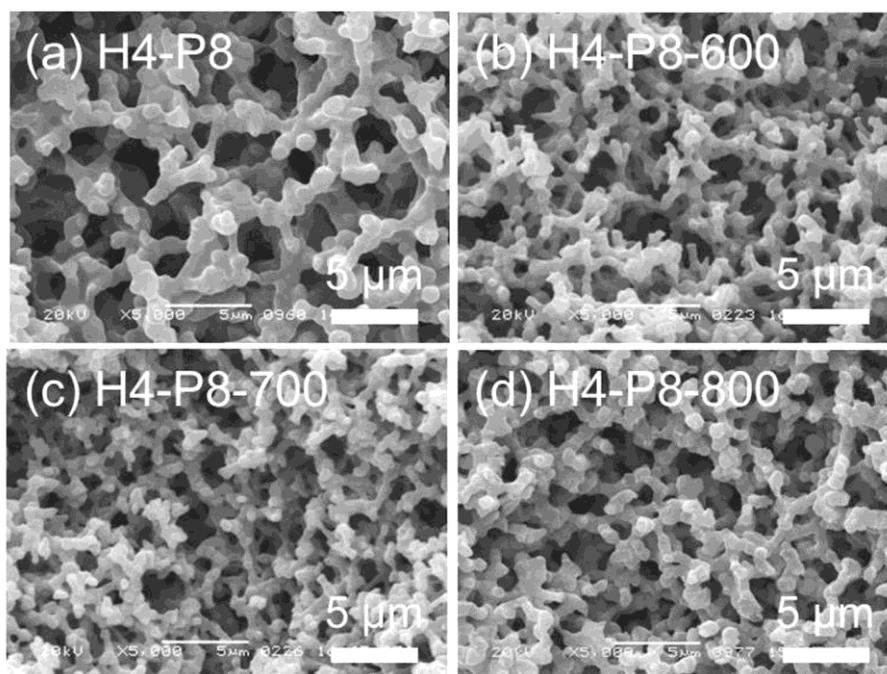

Figure S2 SEM images of the monolithic  $\text{Li}_2\text{FeSiO}_4/\text{carbon}$  composites calcined at different temperatures; (a) H4-P8, (b) H4-P8-600, (c) H4-P8-700, and (d) H4-P8-800.

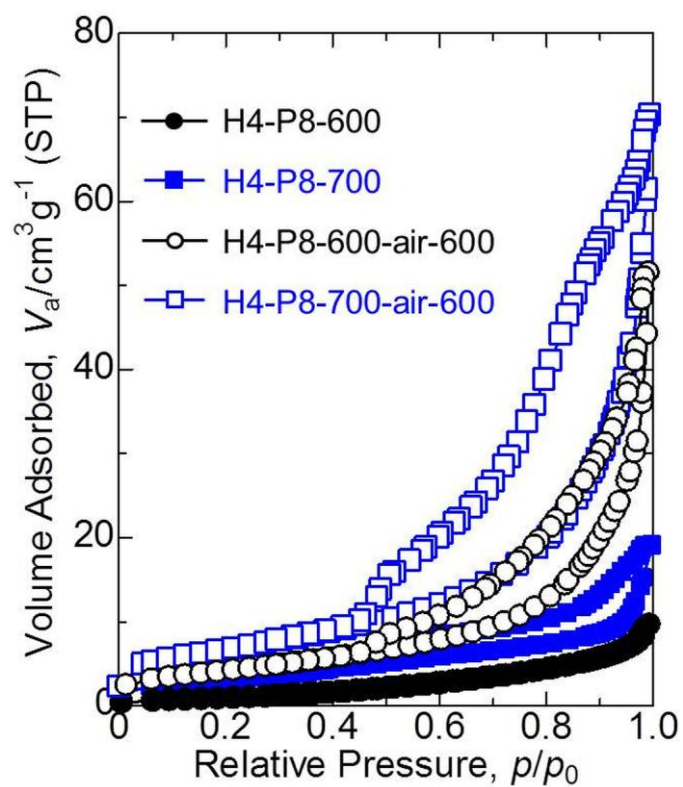

Figure S3 Nitrogen adsorption-desorption isotherms of the  $\text{Li}_2\text{FeSiO}_4/\text{carbon}$  composites and those of the samples after the removal of carbon by the calcination at 600 °C for 2 h under air atmosphere.

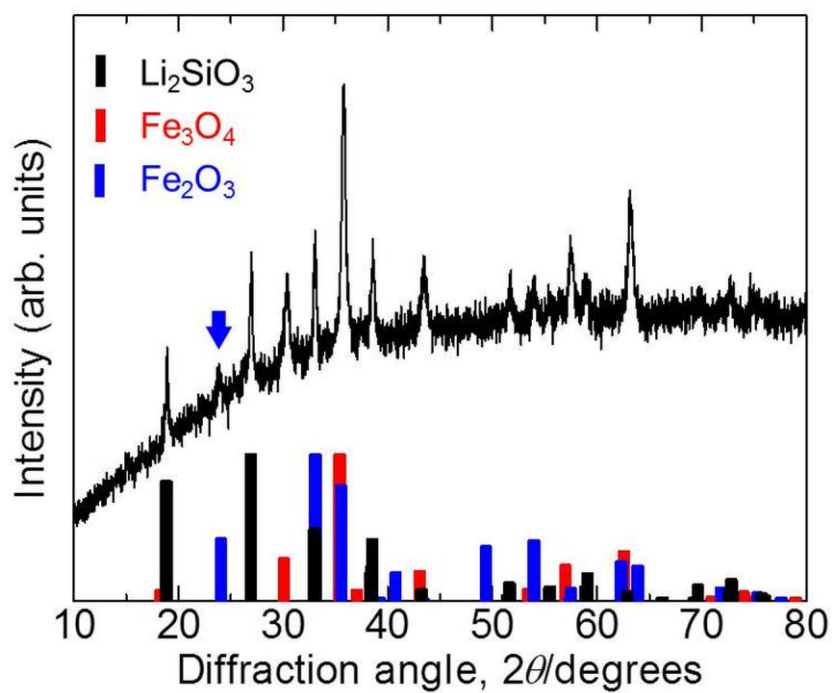

Figure S4 The XRD pattern of the sample calcined at 700 °C under  $\text{N}_2$  atmosphere (H4-P8-700) followed by heat treatment at 800 °C under air atmosphere.

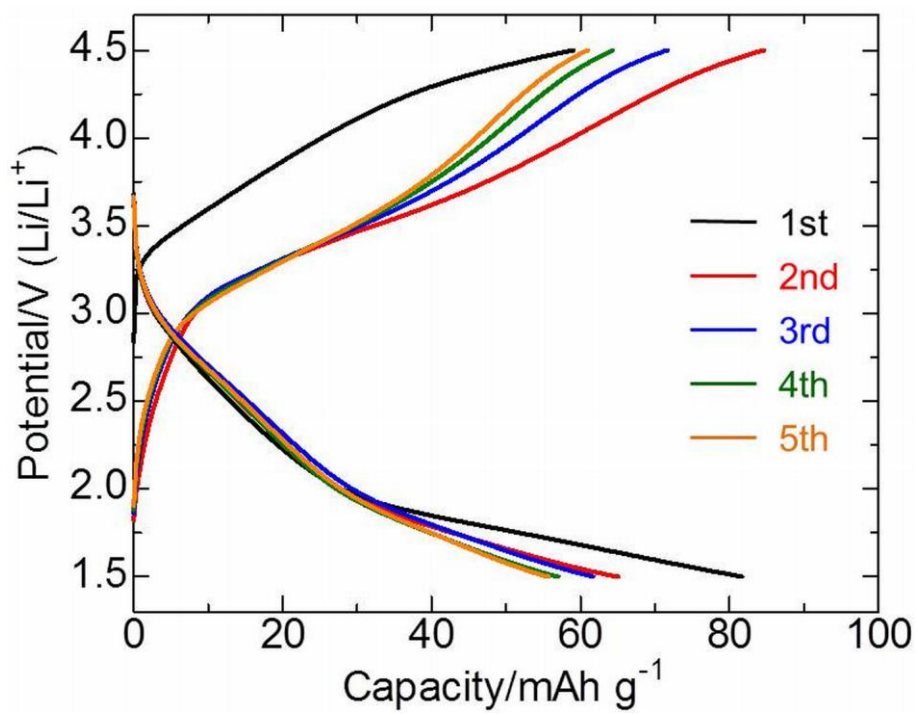

Figure S5 Charge and discharge curves of the electrode prepared from H4-P8-700 at 10 mA g<sup>-1</sup>.

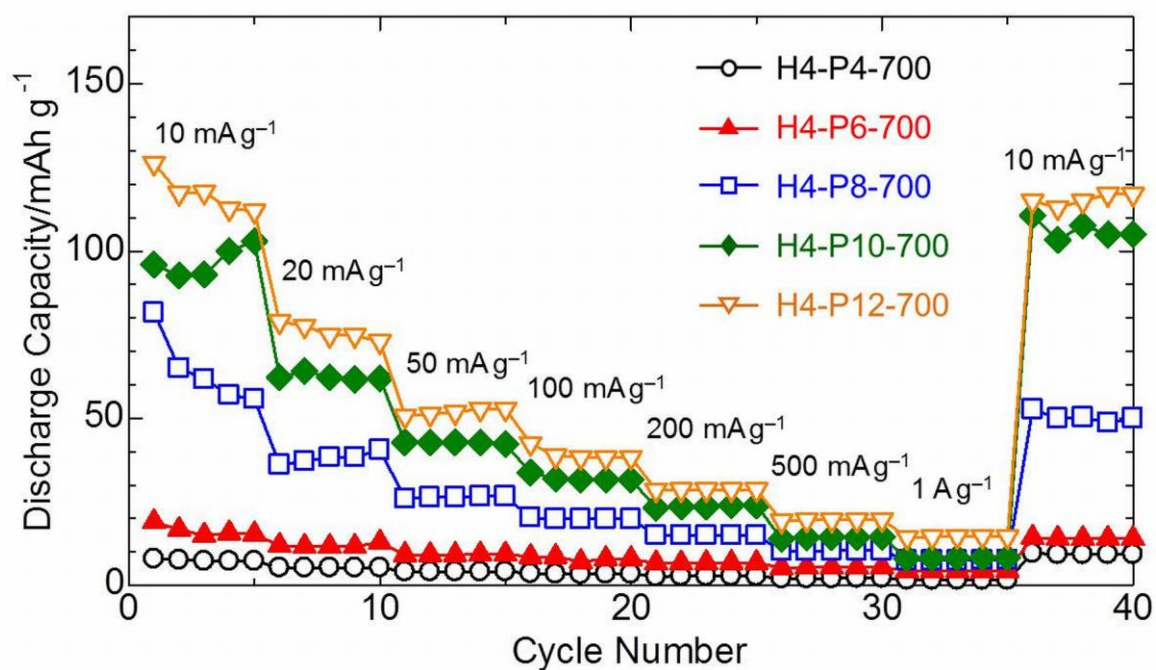

Figure S6 Discharge capacities of the samples calcined at 700 °C from different precursor gels at different currents.
